# Supplementary material for: Synthesis of Y-shaped amphiphilic copolymers by macromolecular azo coupling reaction
Source: Royal Society of Chemistry journal article supplement (doi:10.1039/c4ra14926b), 2014-12-23
Supplement: c4ra14926b1.pdf [file c4ra14926b1.pdf]

## Supporting Information

### Synthesis of Y-shaped amphiphilic copolymers by macromolecular azo coupling reaction

Jilei Wang, Yuqi Zhou, Xiaogong Wang and Yaning He\*

Department of Chemical Engineering, Key Laboratory of Advanced Materials (MOE), Tsinghua University, Beijing, 100084, P. R. China

\*Corresponding author: [heyanning@mail.tsinghua.edu.cn](mailto:heyanning@mail.tsinghua.edu.cn).

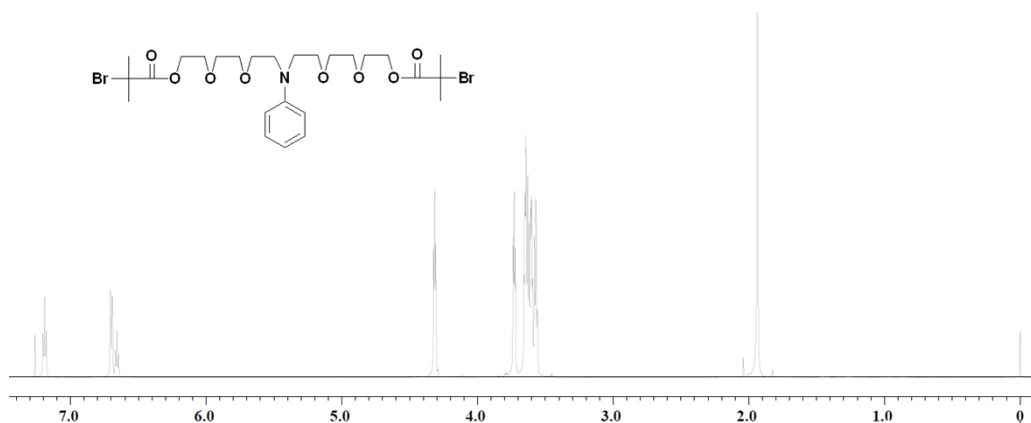

Fig. S1 <sup>1</sup>H NMR spectrum of ATRP initiator in CDCl<sub>3</sub>

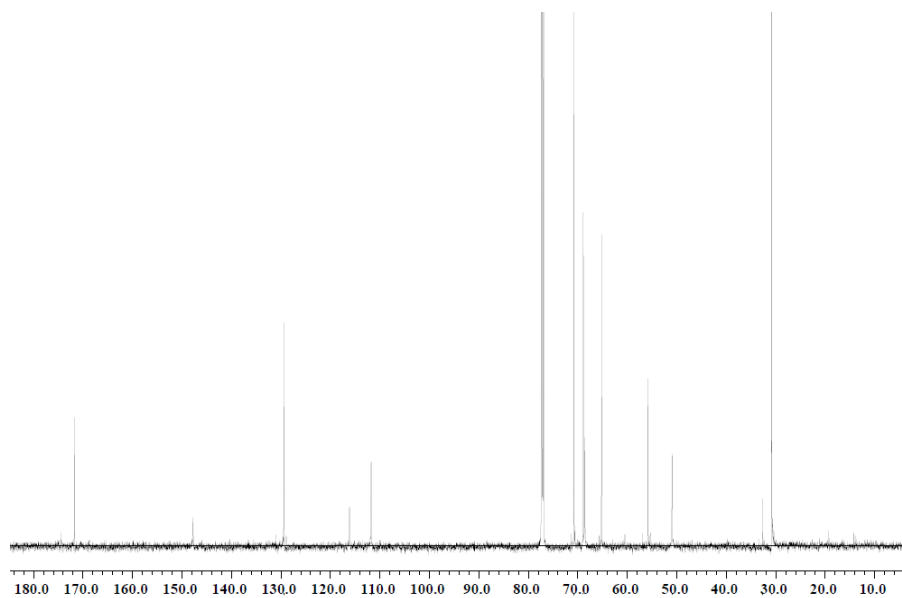

Fig. S2  $^{13}\text{C}$  NMR spectrum of ATRP initiator in  $\text{CDCl}_3$

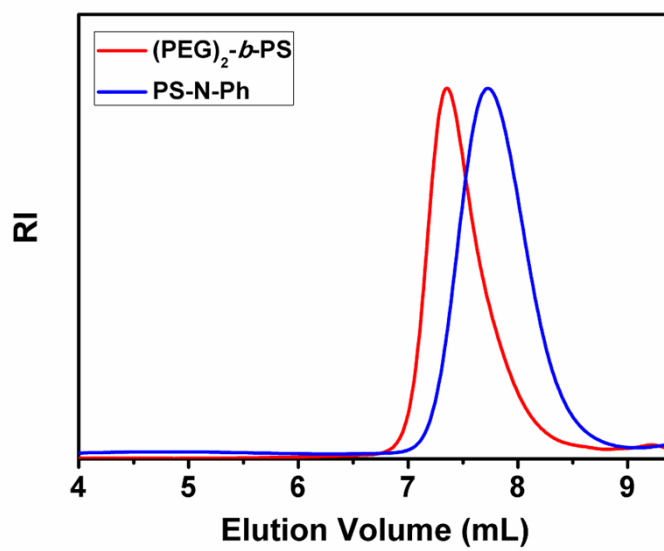

Fig. S3 GPC traces of PS-N-Ph (PDI=1.29,  $M_n$ =8800) and  $(\text{PEG})_2$ -*b*-PS (PDI=1.28,  $M_n$ =13500).
